# Supplementary material
Source: PubMed Central journal article supplement (PMC11131576)
Supplement: NIHMS1993978-supplement-Supplement.pdf [file NIHMS1993978-supplement-Supplement.pdf]

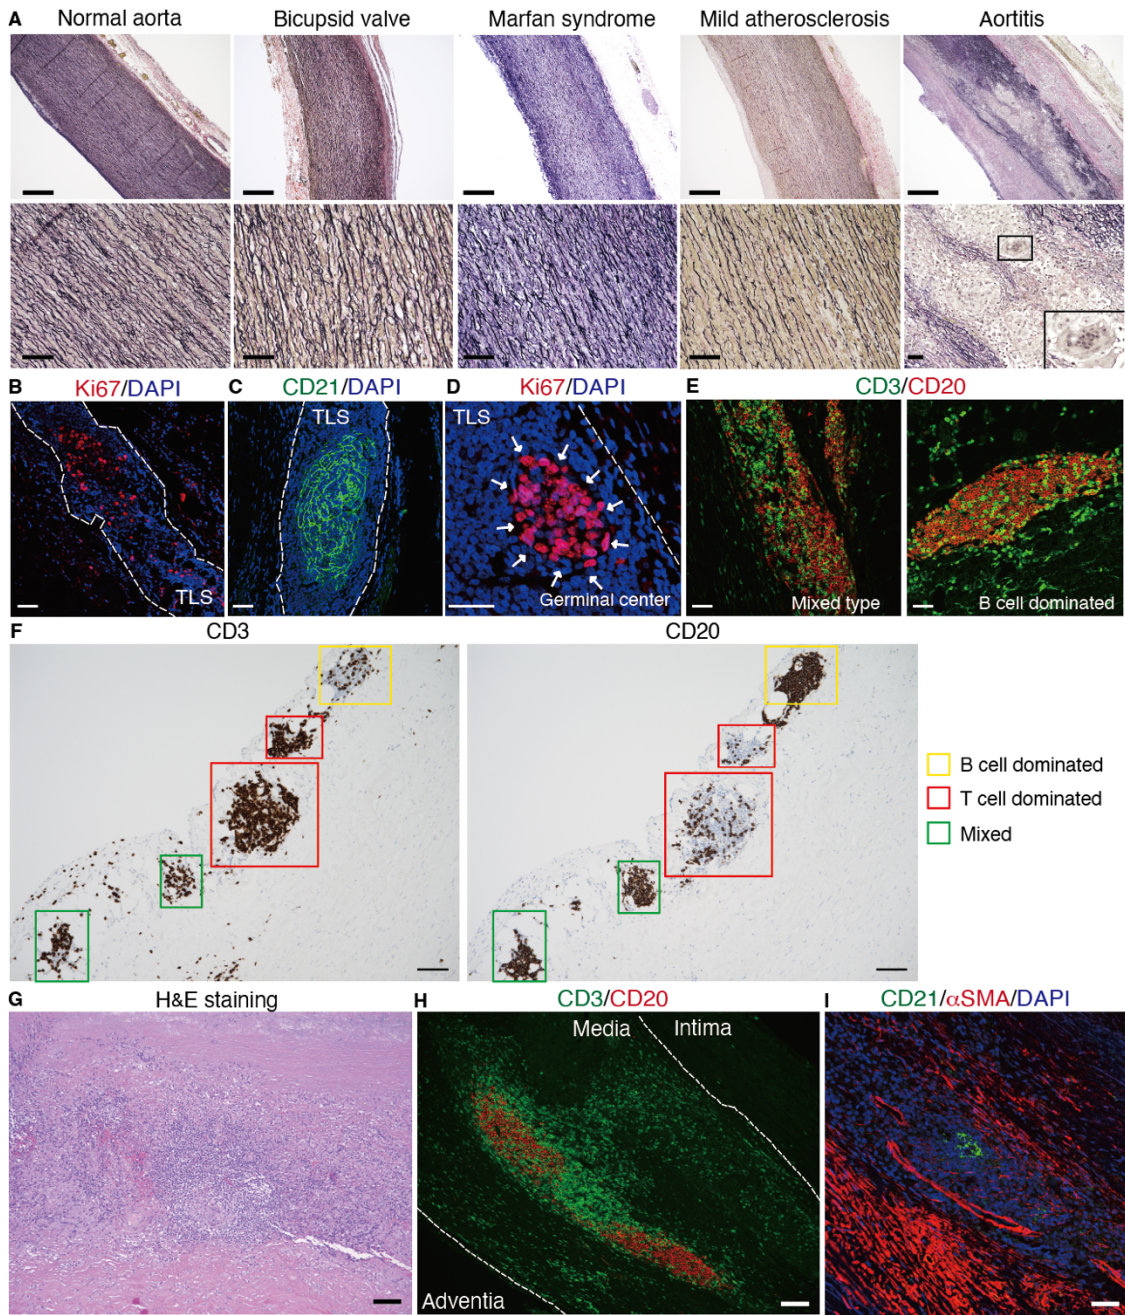

**fig. S1. Immunohistochemical analysis of ascending aortic aneurysms.** (A) Histological analyses of different pathologies in the ascending aorta are displayed. Elastic tissue fibers are visualized by Verhoeff-Van Gieson (VVG) staining. Specimens from cases of autoimmune vasculitis show wall destruction, mononuclear cell infiltrates, and giant cell formation (insert). Scale bars, 500  $\mu\text{m}$  (upper) and 50  $\mu\text{m}$  (lower). **(B to I)** Immunohistochemical analysis of tertiary lymphoid structures (TLS) in the aortic adventitia **(B to F)** and the media **(G to I)** are shown. Immunofluorescence was used to detect Ki67 **(B, D)**, CD21 (follicular dendritic cell marker) **(C)**, CD3 and CD20 **(E, H)**, and CD21 and  $\alpha\text{SMA}$  **(I)**. **(F)** T cells and B cells were visualized by immunohistochemical staining of CD3 and CD20 in serial section samples. **(G)** Shown is hematoxylin and eosin staining. Scale bars, 50  $\mu\text{m}$  **(B to E, I)** and 100  $\mu\text{m}$  **(F to H)**.

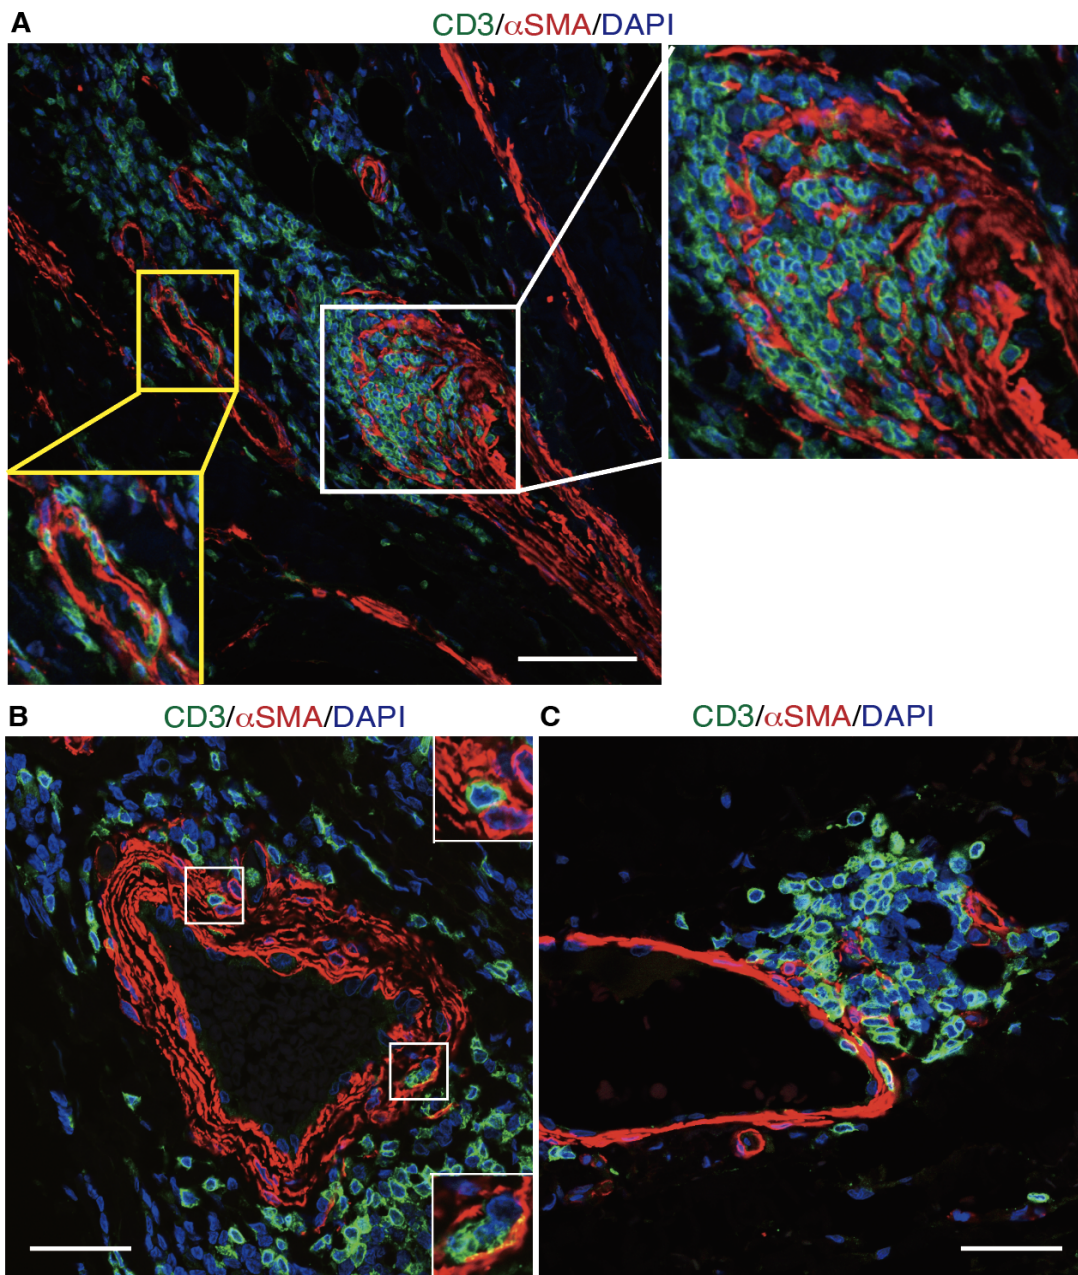

**fig. S2. T cell pockets in the wall of TLS-guiding vessels.** Aortic wall tissue sections from GCA aortitis were analyzed by dual-color immunofluorescence of CD3 and  $\alpha$ SMA. (A to C) Shown is a TLS-guiding artery and vein (A), a TLS-guiding artery (B) and a TLS-guiding vein (C). All TLS-guiding vessels are in immediate contact with T cell clusters and contain layers of T cells embedded into their wall. Scale bars, 100  $\mu$ m (A) and 50  $\mu$ m (B and C).



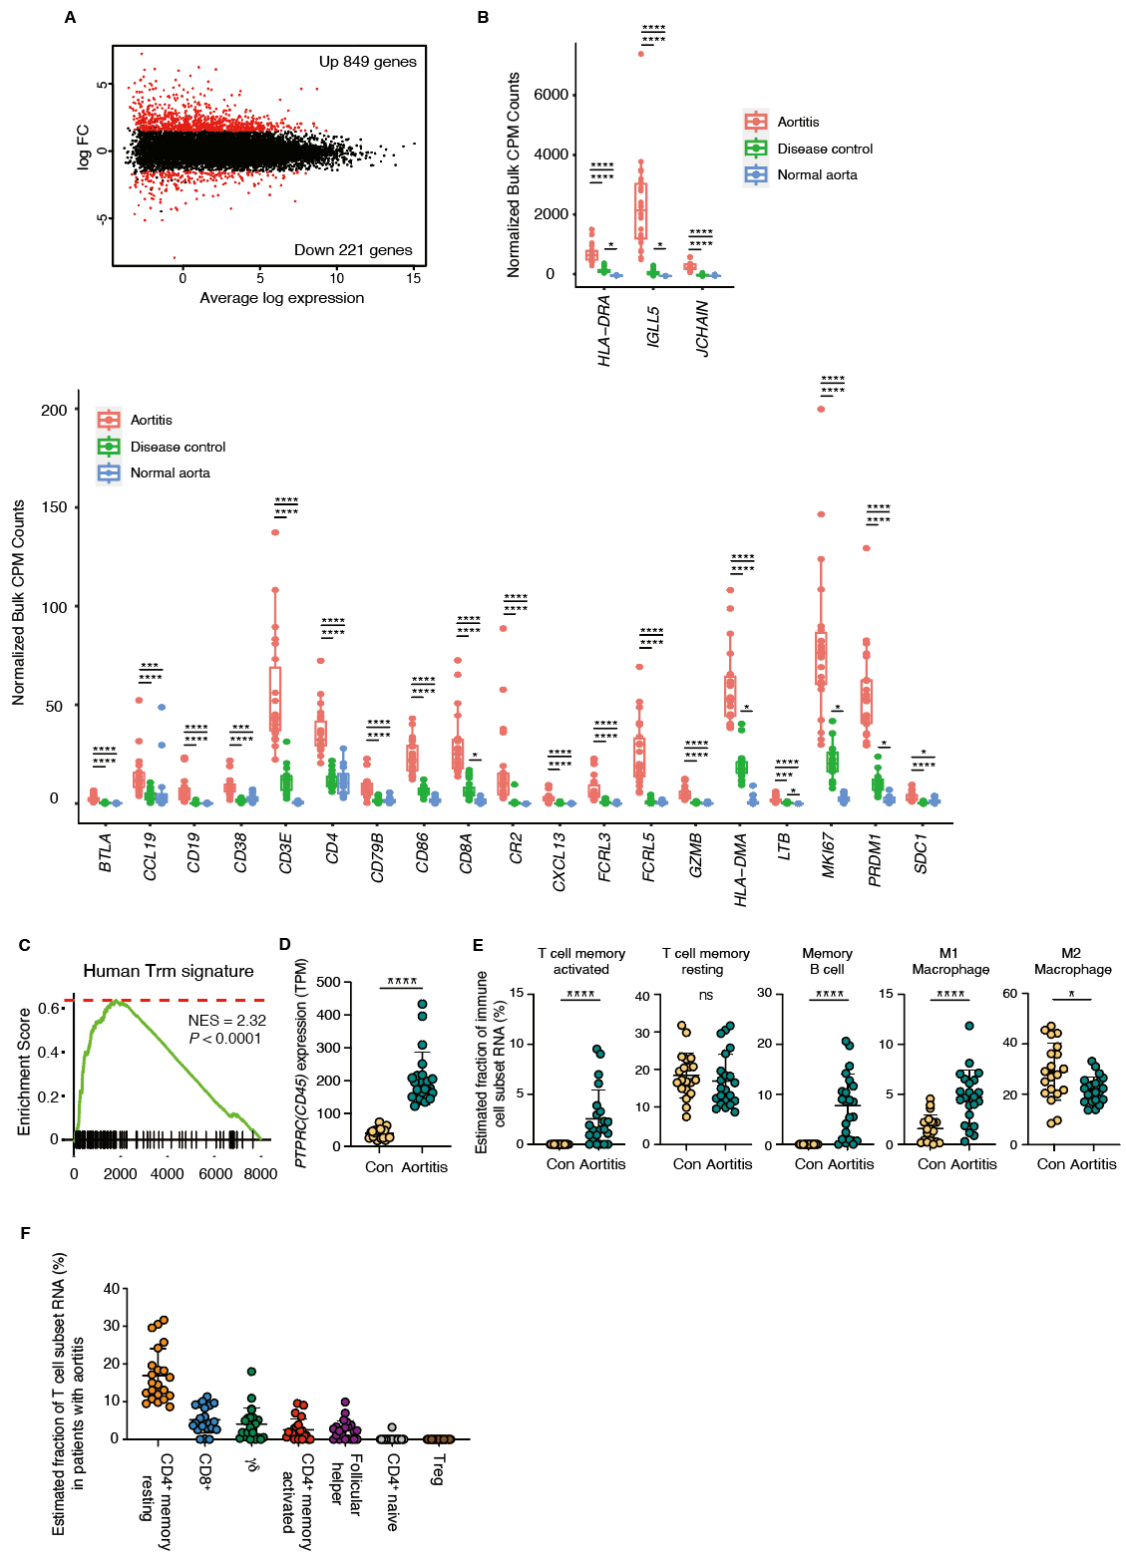



**fig. S3. Transcriptomic analysis of tissues with aortitis, tissues with non-inflamed aneurysm and normal aortic wall.** (A) Differentially expressed genes between aortitis and non-inflamed aortic aneurysm used as a disease control (Con). Black dots represent genes with no significant change in expression, red dots represent genes with significant change in expression. (B) Normalized bulk counts per million reads mapped (CPM) values of TLS-associated genes in aortitis ( $n=22$ ), non-inflamed aortic aneurysm ( $n=20$ ) and normal aortic tissues ( $n=12$ ). The normal aorta data sets were extracted from GSE 141032 (67). Highly abundant gene transcripts (*HLA-DRA*, *IGLL5*, *JCHAIN*) are shown separately. (C) GSEA of human tissue resident memory T (Trm) cells in aortitis ( $n=22$ ) and non-inflamed aortic aneurysms ( $n=20$ ) (NES; Normalized Enrichment Score). (D) Comparison of transcripts per million (TPM) values of *PTPRC* (encoding CD45) in aortitis and disease control cases. (E) Quantitative evaluation of immune cell infiltrates as determined by CIBERSORT analysis of bulk RNA-seq data in aortitis ( $n=22$ ) and non-inflamed aortic aneurysms ( $n=20$ ). (F) Estimated proportions of T cell subpopulations in aortitis were calculated. Data are presented as mean  $\pm$  SD. Data were analyzed by Kruskal-Wallis test (B) or Mann-Whitney *U* test (D, E). \* $P < 0.05$ , \*\* $P < 0.01$ , \*\*\* $P < 0.001$ , \*\*\*\* $P < 0.0001$ ; ns, not significant.

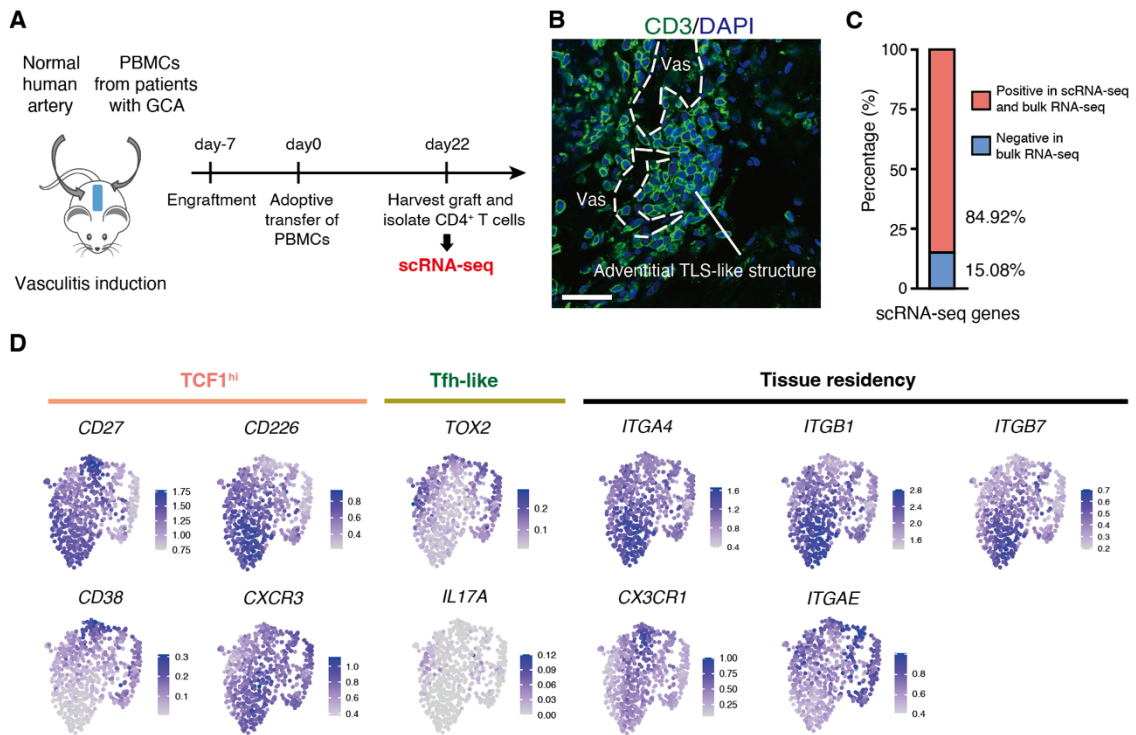

**fig. S4. Transcriptomic analysis of heterogeneous tissue-residing CD4<sup>+</sup> T cells in vasculitis.** (A) Experimental design of vasculitis induction in NOD scid gamma (NSG) mice engrafted with human arteries and reconstituted with patient-derived PBMCs. Explanted arteries were digested, CD4<sup>+</sup> T cells were isolated and analyzed by scRNA-seq. (B) T cell aggregates in the vascular tissues were identified by immunofluorescence visualizing CD3. Scale bar, 50  $\mu$ m. (C) Proportion of the genes identified by scRNA-seq that were also identified by bulk RNA-seq of aortitis patients. (D) UMAP visualization of gene expression in TCF1<sup>hi</sup> CD4<sup>+</sup> T cells (*CD27*, *CD226*, *CD38*, *CXCR3*), Tfh-like cells (*TOX2* and *IL17A*), and tissue residency related genes (*ITGAE*, *ITGB7*, *ITGB1*, *CX3CR1* and *ITGA4*). Data from three chimeric mice are presented.





**fig. S5. Clonal distribution of vasculogenic CD4<sup>+</sup> T cells.** scTCR-seq analysis used the same cDNA starting material as used for scRNA-seq. **(A and B)** Summary data showing the size and clonal distribution of vasculogenic CD4<sup>+</sup> T cells (clonotype frequency > 1 cell). *TRA* (A) and *TRB* (B) frequency (freq) distributions are shown. **(C)** Summary chart displaying clone number overlapping among 5 distinct populations. cyto, cytotoxic.

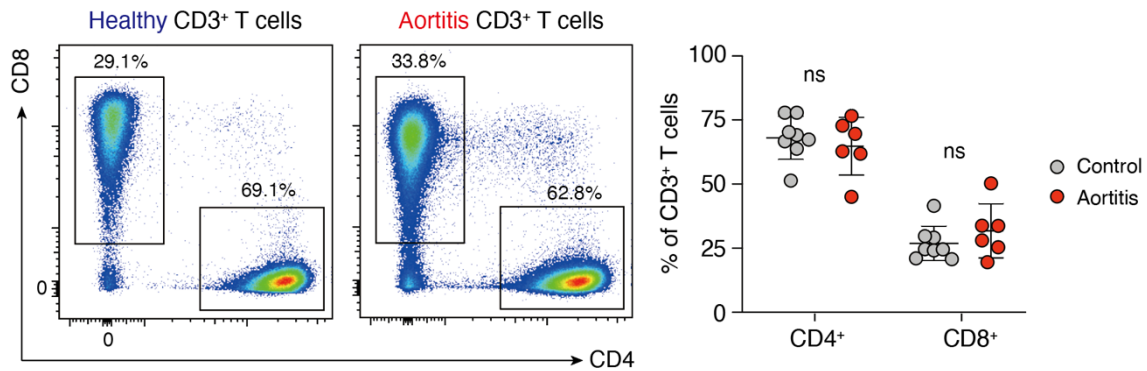

**fig. S6. CD4<sup>+</sup> and CD8<sup>+</sup> T cells in aortitis patients and controls.** PBMCs were collected from patients with a diagnosis of GCA aortitis ( $n=6$ ) and age-matched healthy controls ( $n=8$ ) and analyzed by flow cytometry. Frequencies of CD4<sup>+</sup> and CD8<sup>+</sup> T cells in aortitis patients and controls. Representative dot plots and frequencies of the T cell subsets are shown. Data are presented as mean  $\pm$  SD. Data were analyzed by Mann-Whitney  $U$  test. ns, not significant.

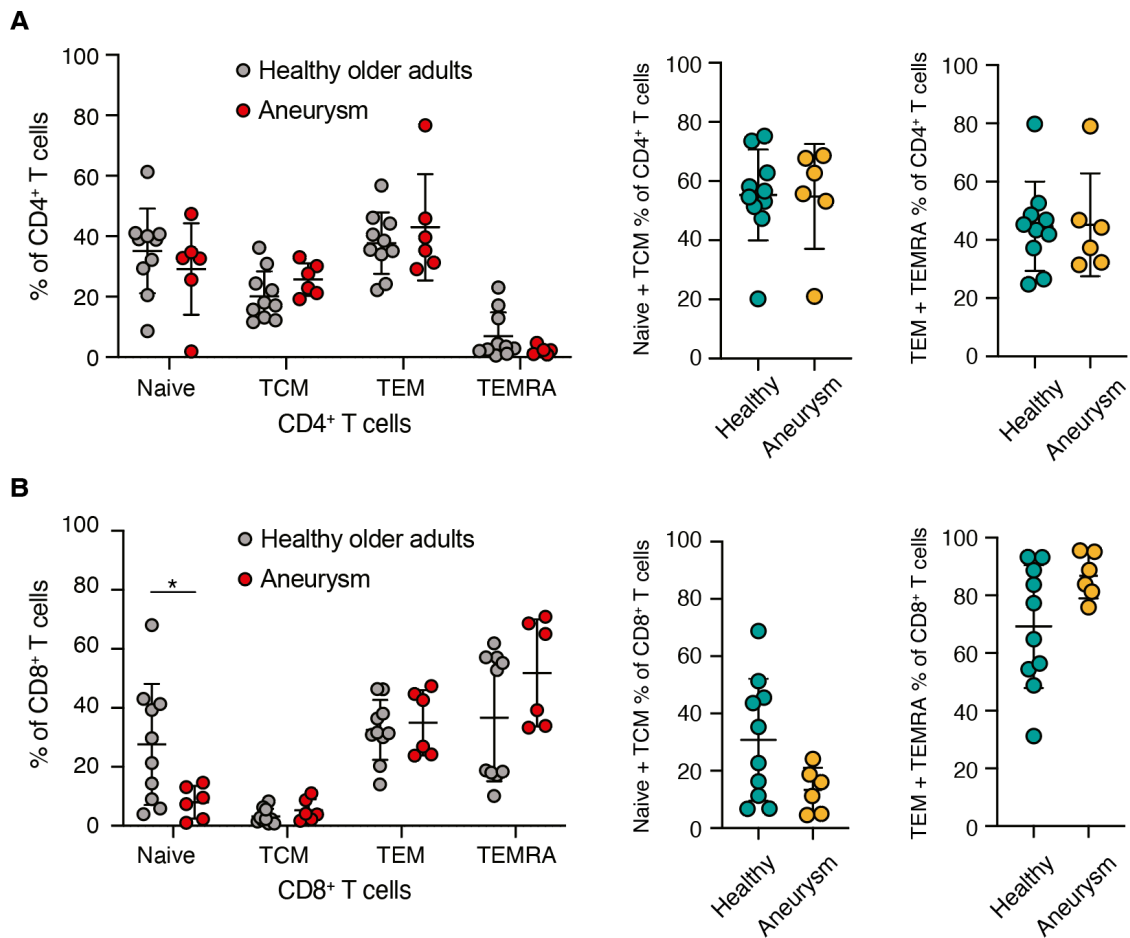

**fig. S7. CD4<sup>+</sup> and CD8<sup>+</sup> T cell subsets in healthy controls and in patients with non-vasculitic aortic aneurysm.** PBMCs were collected from patients with aortic aneurysm ( $n=6$ ) and age-matched healthy controls ( $n=10$ ) and analyzed by flow cytometry. **(A and B)** CD4<sup>+</sup> and CD8<sup>+</sup> T cells from patients with aortic aneurysm and age-matched controls were subdivided into naïve, central memory cells (TCM), effector memory cells (TEM) and effector memory cells re-expressing CD45RA (TEMRA) T cells. Frequencies of the T cell subsets and combined proportions of (naïve plus TCM) and (TEM plus TEMRA) are shown. Data are presented as mean  $\pm$  SD with individual values indicated and were analyzed by unpaired two-tailed  $t$ -test **(A, B)**. \* $P < 0.05$ .



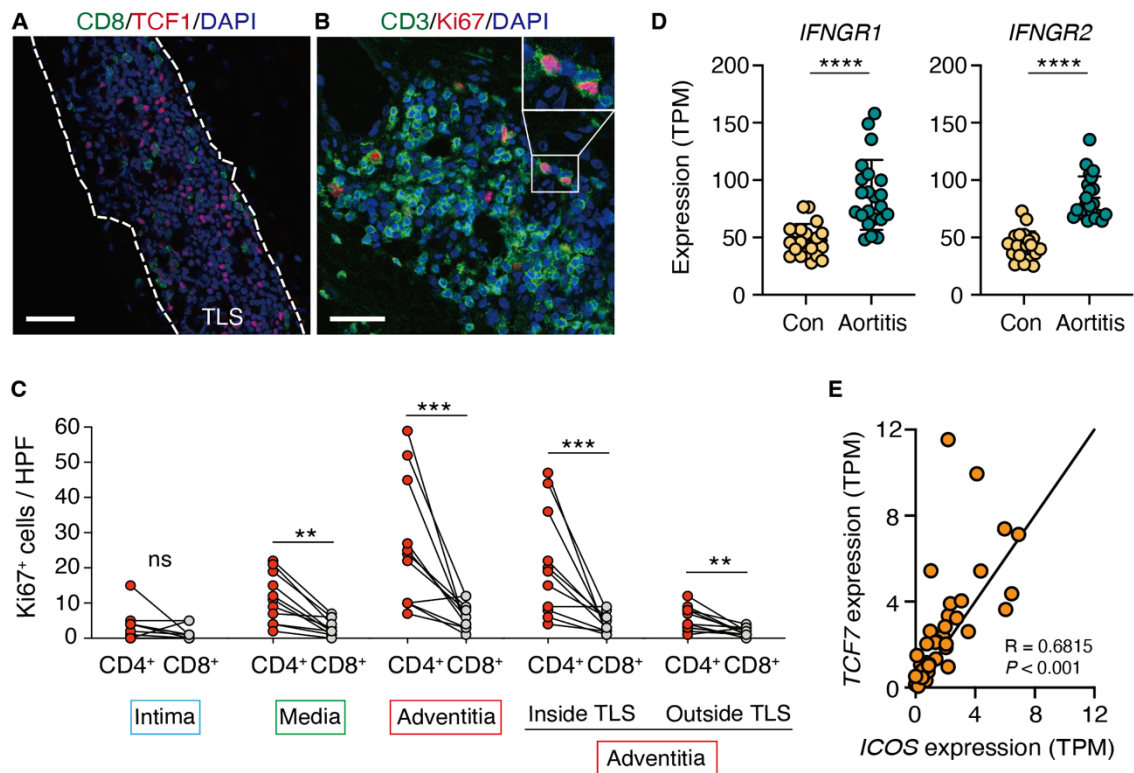

**fig. S8. Characteristics of tissue-residing T cells in aortitis.** T cells were analyzed by dual-color immunofluorescence and bulk RNA-seq of tissues from patients with aortitis and non-inflamed aortic aneurysm as a disease control. **(A to C)** Spatial mapping of TCF1-expressing and proliferating T cells by IF. **(A and B)** Shown is staining for CD8 and TCF1 **(A)** as well as for CD3 and Ki67 **(B)**. Scale bars, 50  $\mu$ m. **(C)** Geographic distribution of CD4<sup>+</sup>Ki67<sup>+</sup> and CD8<sup>+</sup>Ki67<sup>+</sup> T cells in the intima, the media, and the adventitia of 11 cases of GCA aortitis. HPF, high power field. **(D)** Comparison of TPM values of *IFNGR1* and *IFNGR2* in aortitis and disease controls. **(E)** Correlation between TPM values of *TCF7* and *ICOS*. Data are presented as mean  $\pm$  SD. Data in **(C, D)** were analyzed by Mann-Whitney *U* test and the correlation in **(E)** was determined by Pearson's correlation analysis. \*\**P* < 0.01, \*\*\*\**P* < 0.0001; ns, not significant.

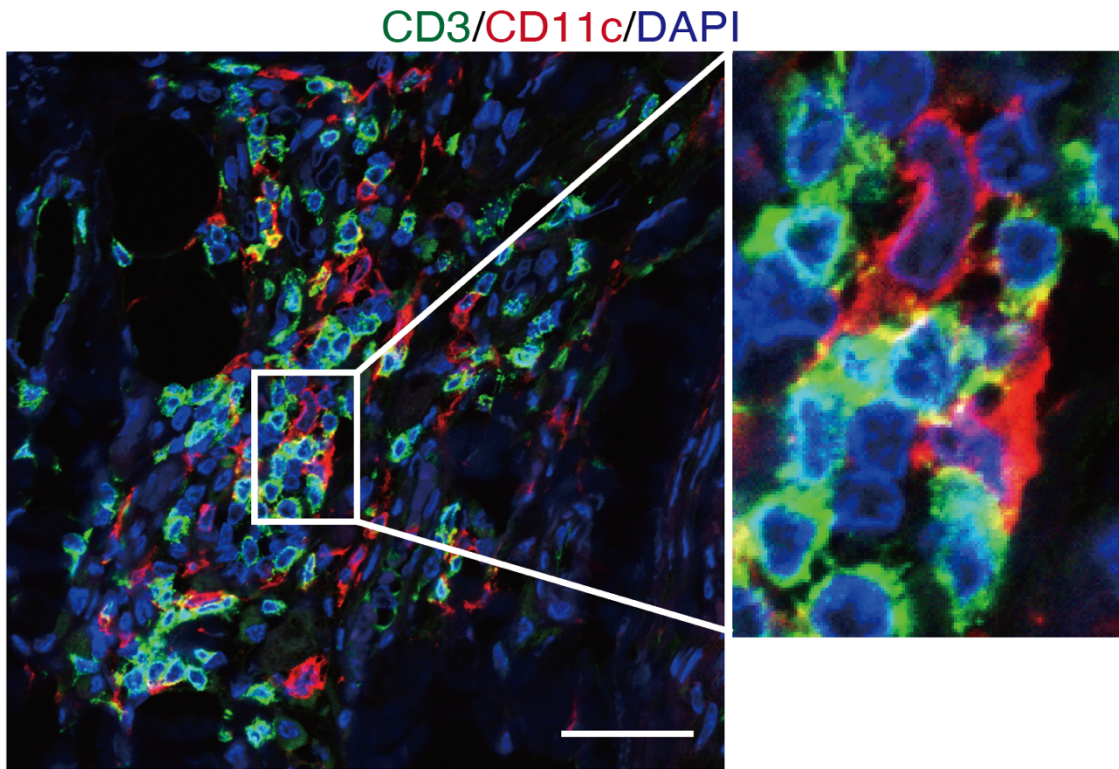

**fig. S9. CD11c<sup>+</sup> dendritic cells have direct contact with T cells.** Immunofluorescence of CD3 and CD11c in tertiary lymphoid structures in aortic tissue from a patient with GCA aortitis. Scale bars, 50  $\mu$ m.

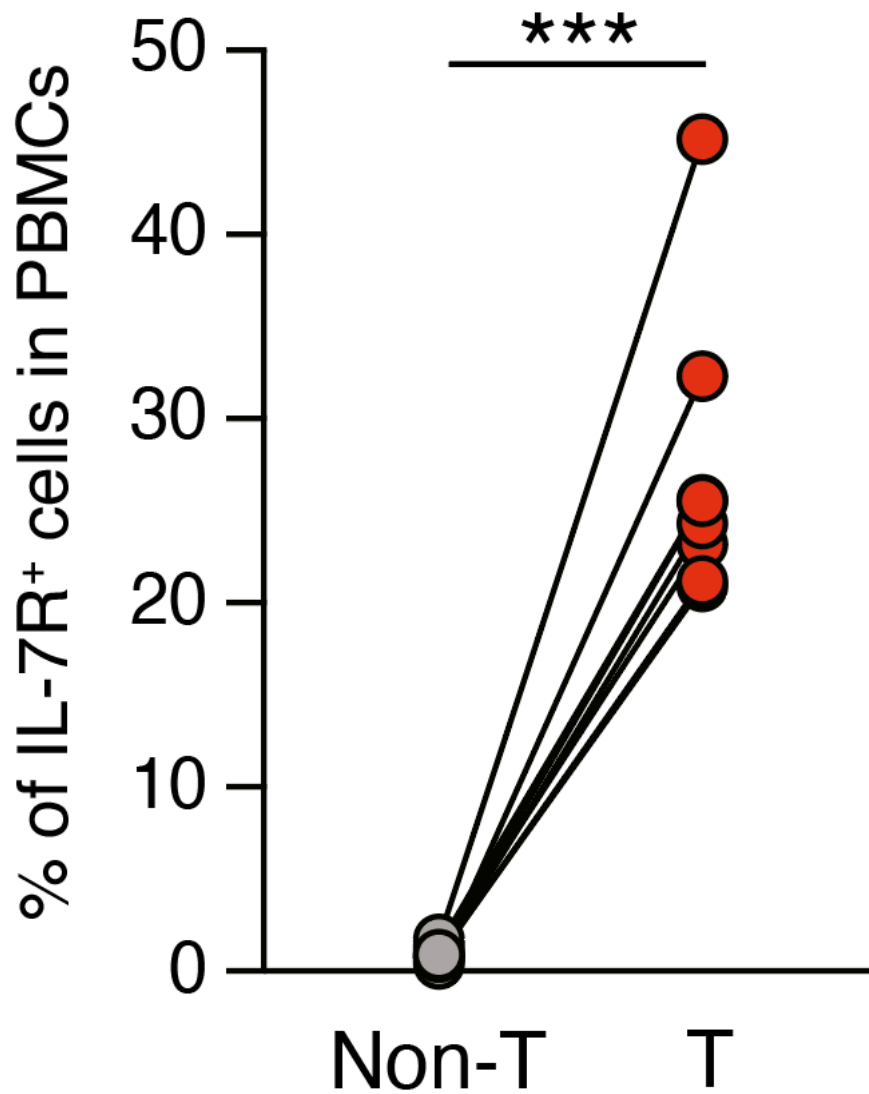

**fig. S10. IL-7 receptor (IL-7R) expression is confined to T cells.**

PBMCs were collected from healthy older adults and IL-7R expression was analyzed by flow cytometry ( $n=8$ ). Frequencies of IL-7R-expressing T cells and non-T cells are shown. Data were analyzed by Mann-Whitney  $U$  test.  $***P < 0.001$ .



**Table S1. Antibody list (Immunofluorescence and Immunohistochemistry)**

| Antigen                      | Company                  | catalog number | Dilution |
|------------------------------|--------------------------|----------------|----------|
| CD3                          | Dako                     | M7254          | 1/200    |
| CD3                          | Abcam                    | ab5690         | 1/200    |
| CD4                          | BIOCARE Medical          | API 3209 AA    | -        |
| CD8                          | BIOCARE Medical          | API 3219 A     | -        |
| CD11c                        | CST                      | #45581         | 1/200    |
| CD20                         | eBioscience              | #14-0202-82    | 1/100    |
| CD21                         | Abcam                    | ab75985        | 1/400    |
| PNAd                         | Biologend                | 120801         | 1/100    |
| aSMA                         | Sigma-Aldrich            | C6198          | 1/600    |
| vWF                          | Abcam                    | ab6994         | 1/200    |
| MKi67                        | Abcam                    | ab16667        | 1/200    |
| MKi67                        | CST                      | #9449          | 1/200    |
| TCF1                         | CST                      | #2203S         | 1/200    |
| EOMES                        | Thermo Fisher Scientific | 50-4877-42     | 1/100    |
| Podoplanin                   | Invitrogen               | 14-9381-80     | 1/100    |
| Alexa Fluor 488-rabbit IgG   | Thermo Fisher Scientific | A-11034        | 1/300    |
| Alexa Fluor 488-mouse IgG    | Thermo Fisher Scientific | A-11001        | 1/300    |
| Alexa Fluor 594-Rabbit IgG   | Thermo Fisher Scientific | A-21207        | 1/300    |
| Alexa Fluor 594-mouse IgG    | Thermo Fisher Scientific | A-11032        | 1/300    |
| Alexa Fluor Plus 647-rat IgG | Thermo Fisher Scientific | A48265         | 1/300    |
| Rat IgG HRP                  | Abcam                    | ab97057        | 1/200    |

**Table S2. Antibody list (Flow Cytometry)**

| Antigen     | Company   | catalog number | conjugated | Dilution |
|-------------|-----------|----------------|------------|----------|
| CD3         | BioLegend | 344842         | BV785      | 1/100    |
| CD3         | BD        | 563546         | UV395      | 1/200    |
| CD4         | Biolegend | 344642         | BV785      | 1/200    |
| CD8         | Biolegend | 344732         | BV510      | 1/200    |
| TCF1        | CST       | 14456          | PE         | 1/100    |
| TBX21       | Biolegend | 644815         | BV421      | 1/100    |
| CD127(IL7R) | Biolegend | 351304         | PE         | 1/100    |
| CD45RA      | BD        | 555488         | FITC       | 1/50     |
| CCR7        | Biolegend | 353225         | PE-Cy7     | 1/100    |
| CD45        | Biolegend | 368532         | PE-Cy7     | 1/100    |

BV: Brilliant Violet, UV: Ultra Violet, PE: Phycoerythrin, FITC: Fluorescein isothiocyanate, Cy7: Cyanine7

**Table S3. Primer sequence for RT-PCR**

|              | Fw                       | R                       |
|--------------|--------------------------|-------------------------|
| <i>ACTB</i>  | GATCATTGCTCCTCCTGAGC     | CGTCATACTCCTGCTTGCTG    |
| <i>IFNG</i>  | ACTAGGCAGCCAACCTAAGCAAGA | CATCAGGGTACCTGACACATTCA |
| <i>GZMB</i>  | GATCATCGGGGGACATGAGG     | TGACATTTATGGAGCTTCCCCA  |
| <i>VEGFA</i> | GGTCGGGCCTCCGAAACCATG    | GCAGCCTGGGACCACTTGGC    |
